# Supplementary material for: Safety Evaluation and Population Pharmacokinetics of Camostat Mesylate and Its Major Metabolites Using a Phase I Study
Source: MDPI journal article supplement (doi:10.3390/pharmaceutics15092357), 2023-09-21
Supplement: s1 [file s1]

# Supplementary Materials: Safety Evaluation and Population Pharmacokinetics of Camostat mesylate and its major metabolits using Phase I study

Gyan-Young Jim, Hyun-ki Moon, Taeheon Kim, So-hye Yun, Hwi-yeol Yoon, Jang-hee Hong and Dae-Duk Kim

**Table S1.** Final model PK parameters and bootstrap results.

| Parameter (unit)            | Estimate | R.S.E (%) | Bootstrap results | 5-95% percentile | Description                          |
|-----------------------------|----------|-----------|-------------------|------------------|--------------------------------------|
| Fixed effect                |          |           |                   |                  |                                      |
| Ka (1/h)                    | 0.757    | 3.71      | 0.754             | 0.697-0.833      | Absorption rate                      |
| Tlag (h)                    | 0.204    | 2.75      | 0.203             | 0.18900.213      | Lag time                             |
| Vd1 (L)                     | 237.9    | 22.8      | 248.6             | 175.7-341.0      | Volume of distribution of GBPA       |
| CL1                         | 1269     | 19.7      | 1685              | 1112-2273        | Clearance of GBPA                    |
| Vd2 (L)                     | 174.6    | 3.58      | 160.0             | 122.9-213.9      | Volume of distribution of GBA        |
| CL2 (L/h)                   | 103.7    | 7.41      | 94.95             | 71.13-130.0      | Clearance of GBA                     |
| FRAC                        | 0.184    | 0.17      | 0.168             | 0.117-0.199      | Fraction of cleared as GBPA          |
| V <sub>max</sub>            | 2.215    | 23        | 1.97              | 1.334-2.723      |                                      |
| K <sub>m</sub>              | 1.192    | 0.19      | 1.89              |                  |                                      |
| Between-subject Variability |          |           |                   |                  |                                      |
| Ka                          | 0.109    | 31.0      | 0.095             | 0.053-0.134      |                                      |
| Tlag                        | 0.089    | 26.2      | 0.093             | 0.047-0.158      |                                      |
| V1                          | 0.813    | 24.1      | 0.755             | 0.531-0.988      |                                      |
| CL1                         | 0.629    | 26.5      | 0.489             | 0.286-0.714      |                                      |
| CL2                         | 0.210    | 26.4      | 0.180             | 0.051-0.281      |                                      |
| V <sub>max</sub>            | 0.820    | 19.7      | 0.739             | 0.445-1.027      |                                      |
| Corr_ V <sub>max</sub> _V1  | -0.89    | 8.62      | -0.868            |                  |                                      |
| Error model                 |          |           |                   |                  |                                      |
| Pro_GBPA                    | 0.25     | 6.66      | 0.247             | 0.209-0.288      | Proportional residual error for GBPA |
| Pro_GBA                     | 0.23     | 6.74      | 0.227             | 0.171-0.283      | Proportional residual error for GBA  |

Ka, absorption rate constant; Tlag, lag time; Vd, volume of distribution; CL, clearance; FRAC, fraction; V<sub>max</sub>, the reaction rate at the state where the enzyme is fully saturated by the substrate; K<sub>m</sub>, the concentration of a substrate at which half of the maximum velocity; Corr, correlation between random effects; Pro, proportional error model.

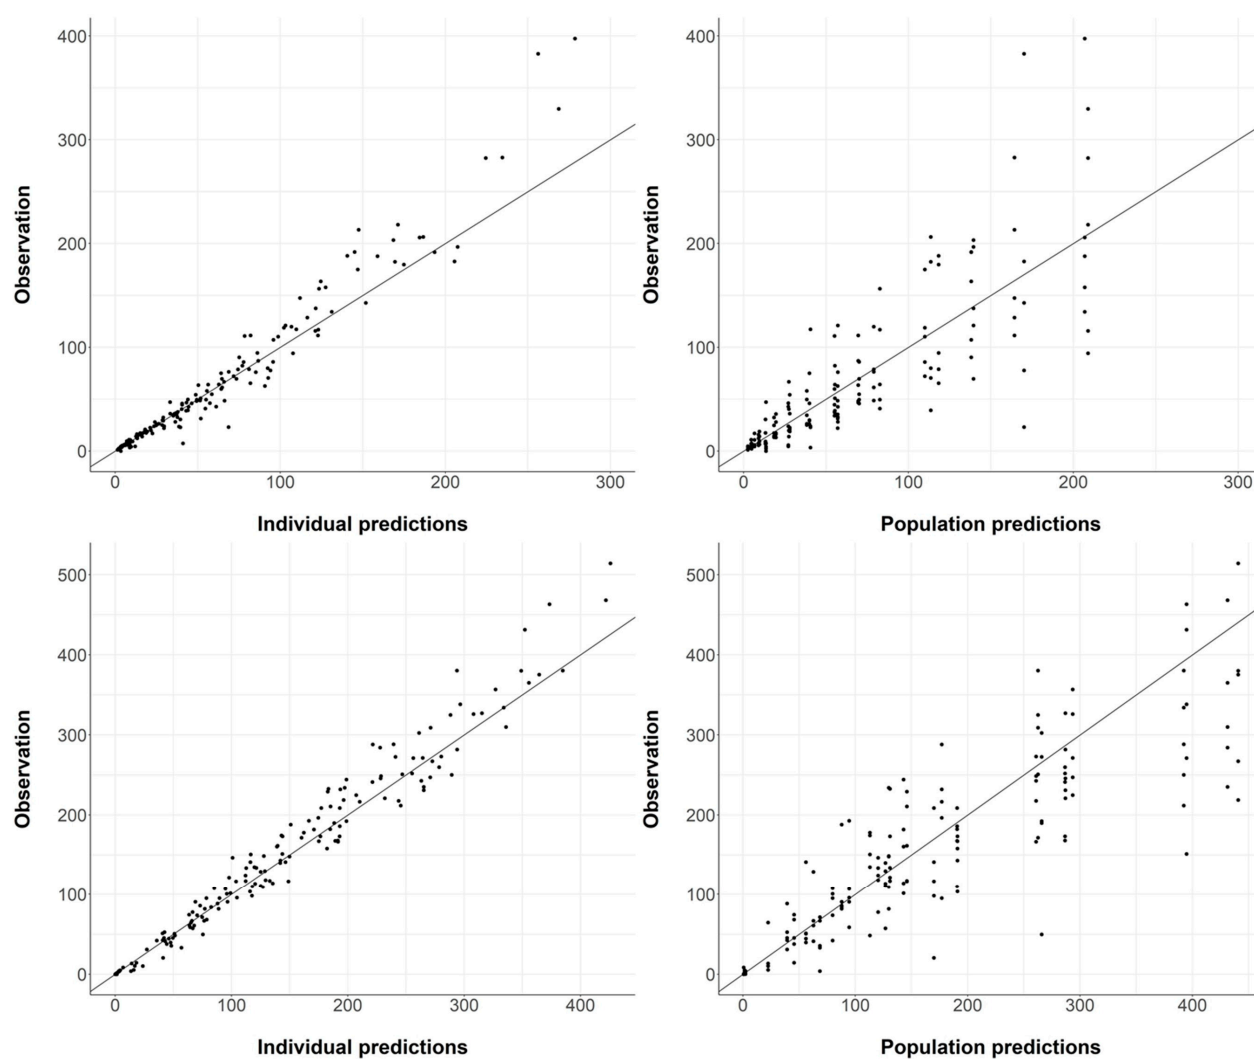

**Figure S1.** Goodness of fit of GBPA (upper) and GBA (lower). Left is observation versus individual prediction. Right is observation versus population prediction.
